# Supplementary material
Source: ML conference proceedings conference paper supplement (https://openreview.net/forum?id=Tq2XqINV1Jz)
Supplement: supplementary_material [file attachment]

## A Technical Proofs

**Proposition 1.** *The distributionally robust tree structured prediction problem based on moment divergence in Eq. (1) can be rewritten as*

$$\min_{\boldsymbol{\theta}} \mathbb{E}_{\mathbb{P}_{\mathbf{X}, \mathbf{Y}}^{\text{emp}}} \underbrace{\min_{\mathbb{P}} \max_{\mathbb{Q}} \mathbb{E}_{\mathbb{P}_{\hat{\mathbf{Y}}|\mathbf{X}}, \mathbb{Q}_{\check{\mathbf{Y}}|\mathbf{X}}} \ell(\hat{\mathbf{Y}}, \check{\mathbf{Y}}) + \boldsymbol{\theta}^\top (\phi(\mathbf{X}, \check{\mathbf{Y}}) - \phi(\mathbf{X}, \mathbf{Y})) + \varepsilon \|\boldsymbol{\theta}\|_*}_{\ell_{\text{adv}}(\boldsymbol{\theta}, \mathbf{X}, \mathbf{Y})},$$

where  $\boldsymbol{\theta} \in \mathbb{R}^d$  is the vector of Lagrangian multipliers and  $\|\cdot\|_*$  is the dual norm of  $\|\cdot\|$ .

*Proof.* Recall the primal problem

$$\min_{\mathbb{P}} \max_{\mathbb{Q} \in \mathcal{B}(\mathbb{P}^{\text{emp}})} \mathbb{E}_{\mathbb{Q}_{\mathbf{X}, \check{\mathbf{Y}}}, \mathbb{P}_{\hat{\mathbf{Y}}|\mathbf{X}}} \ell(\hat{\mathbf{Y}}, \check{\mathbf{Y}}),$$

where  $\mathcal{B}(\mathbb{P}^{\text{emp}}) := \{\mathbb{Q} : \mathbb{Q}_{\mathbf{X}} = \mathbb{P}_{\mathbf{X}}^{\text{emp}} \wedge \|\mathbb{E}_{\mathbb{P}^{\text{emp}}} \phi(\cdot) - \mathbb{E}_{\mathbb{Q}} \phi(\cdot)\| \leq \varepsilon\}$  with  $\varepsilon \geq 0$ .

Note the feature function  $\phi(\cdot)$  is fixed and given. Since  $\mathbb{P}_{\hat{\mathbf{Y}}|\mathbf{X}} \in \Delta$  and  $\mathbb{Q}_{\mathbf{X}, \check{\mathbf{Y}}} \in \Delta \cap \mathcal{B}(\mathbb{P}^{\text{emp}})$  where  $\Delta$  is the probability simplex with dimension omitted, the constraint sets are convex. The objective function is convex in  $\mathbb{P}$  and concave in  $\mathbb{Q}$  because it is affine in both. Therefore strong duality holds:

$$\max_{\mathbb{Q} \in \mathcal{B}(\mathbb{P}^{\text{emp}})} \min_{\mathbb{P}} \mathbb{E}_{\mathbb{Q}_{\mathbf{X}, \check{\mathbf{Y}}}, \mathbb{P}_{\hat{\mathbf{Y}}|\mathbf{X}}} \ell(\hat{\mathbf{Y}}, \check{\mathbf{Y}}).$$

Let  $\mathcal{C} := \{\mathbf{u} : \|\mathbf{u} - \mathbb{E}_{\mathbb{P}^{\text{emp}}} \phi(\cdot)\| \leq \varepsilon\}$ . Rewrite the problem with this constraint:

$$\begin{aligned} & \sup_{\mathbb{Q}, \mathbf{u}} \min_{\mathbb{P}} \mathbb{E}_{\mathbb{P}_{\hat{\mathbf{Y}}|\mathbf{X}}, \mathbb{Q}_{\check{\mathbf{Y}}|\mathbf{X}}} \ell(\hat{\mathbf{Y}}, \check{\mathbf{Y}}) - I_{\mathcal{C}}(\mathbf{u}) \\ \text{s.t. } & \mathbf{u} = \mathbb{E}_{\mathbb{P}_{\hat{\mathbf{Y}}|\mathbf{X}}, \mathbb{Q}_{\check{\mathbf{Y}}|\mathbf{X}}} \phi(\mathbf{X}, \check{\mathbf{Y}}), \end{aligned}$$

where  $I_{\mathcal{C}}(\cdot)$  is the indicator function with  $I_{\mathcal{C}}(\mathbf{x}) = 0$  if  $\mathbf{x} \in \mathcal{C}$  and  $+\infty$  otherwise. The simplex constraints are omitted.

The dual problem by relaxing the equality constraint is

$$\sup_{\mathbb{Q}, \mathbf{u}} \min_{\boldsymbol{\theta}} \min_{\mathbb{P}} \mathbb{E}_{\mathbb{P}_{\hat{\mathbf{Y}}|\mathbf{X}}, \mathbb{Q}_{\check{\mathbf{Y}}|\mathbf{X}}} \ell(\hat{\mathbf{Y}}, \check{\mathbf{Y}}) - I_{\mathcal{C}}(\mathbf{u}) + \boldsymbol{\theta}^\top \mathbb{E}_{\mathbb{P}_{\hat{\mathbf{Y}}|\mathbf{X}}, \mathbb{Q}_{\check{\mathbf{Y}}|\mathbf{X}}} \phi(\mathbf{X}, \check{\mathbf{Y}}) - \boldsymbol{\theta}^\top \mathbf{u},$$

where  $\boldsymbol{\theta}$  is the vector of Lagrange multipliers.

Given  $\mathbf{X} = \mathbf{x}$ , optimization of  $\mathbb{Q}_{\check{\mathbf{Y}}|\mathbf{x}}$  and  $\mathbb{P}_{\hat{\mathbf{Y}}|\mathbf{x}}$  can be done independently. Again by strong duality, we can rearrange the terms:

$$\min_{\boldsymbol{\theta}} \mathbb{E}_{\mathbb{P}_{\hat{\mathbf{Y}}|\mathbf{x}}} \min_{\mathbb{P}} \max_{\mathbb{Q}} \mathbb{E}_{\mathbb{Q}_{\check{\mathbf{Y}}|\mathbf{x}}, \mathbb{P}_{\hat{\mathbf{Y}}|\mathbf{x}}} \ell(\hat{\mathbf{Y}}, \check{\mathbf{Y}}) + \boldsymbol{\theta}^\top \phi(\mathbf{X}, \check{\mathbf{Y}}) + \sup_{\mathbf{u}} -I_{\mathcal{C}}(\mathbf{u}) - \boldsymbol{\theta}^\top \mathbf{u}.$$

The associated dual norm  $\|\cdot\|_*$  of the norm  $\|\cdot\|$  is defined as

$$\|z\|_* := \sup\{z^\top \mathbf{x} : \|\mathbf{x}\| \leq 1\},$$

based on which we are able to simplify the optimization over  $\mathbf{u}$  as

$$\sup_{\mathbf{u}} -I_{\mathcal{C}}(\mathbf{u}) - \boldsymbol{\theta}^\top \mathbf{u} = \sup_{\mathbf{u} \in \mathcal{C}} -\boldsymbol{\theta}^\top \mathbf{u} = \sup_{\mathbf{e}: \|\mathbf{e}\| \leq 1} -\boldsymbol{\theta}^\top (\mathbb{E}_{\mathbb{P}^{\text{emp}}} \phi(\cdot) - \varepsilon \mathbf{e}) = -\boldsymbol{\theta}^\top \mathbb{E}_{\mathbb{P}^{\text{emp}}} \phi(\cdot) + \varepsilon \|\boldsymbol{\theta}\|_*.$$

Plugging it back to the dual problem, we have

$$\min_{\boldsymbol{\theta}} \mathbb{E}_{\mathbb{P}_{\hat{\mathbf{Y}}|\mathbf{x}}, \mathbb{P}_{\check{\mathbf{Y}}|\mathbf{x}}} \min_{\mathbb{P}} \max_{\mathbb{Q}} \mathbb{E}_{\mathbb{Q}_{\check{\mathbf{Y}}|\mathbf{x}}, \mathbb{P}_{\hat{\mathbf{Y}}|\mathbf{x}}} \ell(\hat{\mathbf{Y}}, \check{\mathbf{Y}}) + \boldsymbol{\theta}^\top (\phi(\mathbf{X}, \check{\mathbf{Y}}) - \phi(\mathbf{X}, \mathbf{Y})) + \varepsilon \|\boldsymbol{\theta}\|_*.$$

□

**Theorem 2.** *Given  $m$  samples, a non-negative loss  $\ell(\cdot, \cdot)$  such that  $|\ell(\cdot, \cdot)| \leq K$ , a feature function  $\phi(\cdot, \cdot)$  such that  $\|\phi(\cdot, \cdot)\| \leq B$ , a positive ambiguity level  $\varepsilon > 0$ , then, for any  $\rho \in (0, 1]$ , with a probability at least  $1 - \rho$ , the following excess true worst-case risk bound holds:*

$$\max_{\mathbb{Q} \in \mathcal{B}(\mathbb{P}^{\text{true}})} R_{\mathbb{Q}}^L(\boldsymbol{\theta}_{\text{emp}}^*) - \max_{\mathbb{Q} \in \mathcal{B}(\mathbb{P}^{\text{true}})} R_{\mathbb{Q}}^L(\boldsymbol{\theta}_{\text{true}}^*) \leq \frac{4KB}{\varepsilon\sqrt{m}} \left( 1 + \frac{3}{2} \sqrt{\frac{\ln(4/\rho)}{2}} \right),$$

where  $\theta_{emp}^*$  and  $\theta_{true}^*$  are the optimal parameters learned in Eq. (2) under  $\mathbb{P}^{emp}$  and  $\mathbb{P}^{true}$  respectively. The original risk of  $\theta$  under  $\mathbb{Q}$  is  $R_{\mathbb{Q}}^L(\theta) := \mathbb{E}_{\mathbb{Q}_{\mathbf{X}, \mathbf{Y}}, \mathbb{P}_{\hat{\mathbf{Y}}|\mathbf{X}}^{\theta}} \ell(\hat{\mathbf{Y}}, \mathbf{Y})$  with Bayes prediction  $\mathbb{P}_{\hat{\mathbf{Y}}|\mathbf{X}}^{\theta} \in \arg \min_{\mathbb{P}} \max_{\mathbb{Q}} \mathbb{E}_{\mathbb{Q}_{\hat{\mathbf{Y}}|\mathbf{x}}, \mathbb{P}_{\hat{\mathbf{Y}}|\mathbf{x}}} \ell(\hat{\mathbf{Y}}, \check{\mathbf{Y}}) + \theta^{\top} \phi(\mathbf{x}, \check{\mathbf{Y}})$ .

*Proof.* Define the adversarial surrogate risk of  $\theta$  with respect to  $\tilde{\mathbb{P}}$  as

$$R_{\tilde{\mathbb{P}}}^S(\theta) := \mathbb{E}_{\tilde{\mathbb{P}}_{\mathbf{X}, \mathbf{Y}}} \ell_{\text{adv}}(\theta, (\mathbf{X}, \mathbf{Y})) := \mathbb{E}_{\tilde{\mathbb{P}}_{\mathbf{X}, \mathbf{Y}}} \min_{\mathbb{P}} \max_{\mathbb{Q}} \mathbb{E}_{\mathbb{Q}_{\hat{\mathbf{Y}}|\mathbf{x}}, \mathbb{P}_{\hat{\mathbf{Y}}|\mathbf{x}}} \ell(\hat{\mathbf{Y}}, \check{\mathbf{Y}}) + \theta^{\top} (\phi(\mathbf{X}, \check{\mathbf{Y}}) - \phi(\mathbf{X}, \mathbf{Y})) + \varepsilon \|\theta\|_*.$$

Let  $\theta_{true}^* \in \arg \min_{\theta} R_{\mathbb{P}^{true}}^S(\theta)$  and  $\theta_{emp}^* \in \arg \min_{\theta} R_{\mathbb{P}^{emp}}^S(\theta)$  be the optimal parameters learned with  $\mathbb{P}_{\mathbf{X}, \mathbf{Y}}^{true}$  and  $\mathbb{P}_{\mathbf{X}, \mathbf{Y}}^{emp}$  respectively.

Given  $\mathbf{x}$ , define the decoded prediction by  $\theta$  as

$$\mathbb{P}_{\hat{\mathbf{Y}}|\mathbf{x}}^{\theta} \in \arg \min_{\mathbb{P}} \max_{\mathbb{Q}} \mathbb{E}_{\mathbb{Q}_{\hat{\mathbf{Y}}|\mathbf{x}}, \mathbb{P}_{\hat{\mathbf{Y}}|\mathbf{x}}} \ell(\hat{\mathbf{Y}}, \check{\mathbf{Y}}) + \theta^{\top} \phi(\mathbf{x}, \check{\mathbf{Y}}).$$

Let the original risk of loss  $\ell$  under some distribution  $\mathbb{Q}$  be

$$R_{\mathbb{Q}}^L(\theta) := \mathbb{E}_{\mathbb{Q}_{\mathbf{X}, \mathbf{Y}}, \mathbb{P}_{\hat{\mathbf{Y}}|\mathbf{X}}^{\theta}} \ell(\hat{\mathbf{Y}}, \mathbf{Y}).$$

According to Proposition 1, for any fixed  $\mathbb{P}$ , we have similarly

$$\max_{\mathbb{Q} \in \mathcal{B}(\mathbb{P}^{emp})} \mathbb{E}_{\mathbb{Q}_{\mathbf{X}, \mathbf{Y}}, \mathbb{P}_{\hat{\mathbf{Y}}|\mathbf{X}}} \ell(\hat{\mathbf{Y}}, \check{\mathbf{Y}}) \triangleq \min_{\theta} \mathbb{E}_{\mathbb{P}^{emp}} \max_{\mathbb{Q}} \mathbb{E}_{\mathbb{Q}_{\hat{\mathbf{Y}}|\mathbf{x}}, \mathbb{P}_{\hat{\mathbf{Y}}|\mathbf{x}}} \ell(\hat{\mathbf{Y}}, \check{\mathbf{Y}}) + \theta^{\top} (\phi(\mathbf{X}, \check{\mathbf{Y}}) - \phi(\mathbf{X}, \mathbf{Y})) + \varepsilon \|\theta\|_*.$$

We start by looking at the worst-case risk of  $\theta_{true}^*$  and  $\theta_{emp}^*$ .

$$\begin{aligned} & \max_{\mathbb{Q} \in \mathcal{B}(\mathbb{P}^{true})} R_{\mathbb{Q}}^L(\theta_{emp}^*) \\ &= \min_{\theta} \mathbb{E}_{\mathbb{P}^{true}} \max_{\mathbb{Q}} \mathbb{E}_{\mathbb{Q}_{\hat{\mathbf{Y}}|\mathbf{x}}, \mathbb{P}_{\hat{\mathbf{Y}}|\mathbf{x}}^{\theta_{emp}^*}} \ell(\hat{\mathbf{Y}}, \check{\mathbf{Y}}) + \theta^{\top} (\phi(\mathbf{X}, \check{\mathbf{Y}}) - \phi(\mathbf{X}, \mathbf{Y})) + \varepsilon \|\theta\|_* \\ &\leq \mathbb{E}_{\mathbb{P}^{true}} \max_{\mathbb{Q}} \mathbb{E}_{\mathbb{Q}_{\hat{\mathbf{Y}}|\mathbf{x}}, \mathbb{P}_{\hat{\mathbf{Y}}|\mathbf{x}}^{\theta_{emp}^*}} \ell(\hat{\mathbf{Y}}, \check{\mathbf{Y}}) + \theta_{emp}^* \cdot (\phi(\mathbf{X}, \check{\mathbf{Y}}) - \phi(\mathbf{X}, \mathbf{Y})) + \varepsilon \|\theta_{emp}^*\|_*, \end{aligned}$$

where the last inequality holds because  $\theta_{emp}^*$  is not necessarily a minimizer. Similarly for  $\theta_{true}^*$ ,

$$\max_{\mathbb{Q} \in \mathcal{B}(\mathbb{P}^{true})} R_{\mathbb{Q}}^L(\theta_{true}^*) \leq \mathbb{E}_{\mathbb{P}^{true}} \max_{\mathbb{Q}} \mathbb{E}_{\mathbb{Q}_{\hat{\mathbf{Y}}|\mathbf{x}}, \mathbb{P}_{\hat{\mathbf{Y}}|\mathbf{x}}^{\theta_{true}^*}} \ell(\hat{\mathbf{Y}}, \check{\mathbf{Y}}) + \theta_{true}^* \cdot (\phi(\mathbf{X}, \check{\mathbf{Y}}) - \phi(\mathbf{X}, \mathbf{Y})) + \varepsilon \|\theta_{true}^*\|_*.$$

On the other hand,

$$\begin{aligned} & \mathbb{E}_{\mathbb{P}^{true}} \max_{\mathbb{Q}} \mathbb{E}_{\mathbb{Q}_{\hat{\mathbf{Y}}|\mathbf{x}}, \mathbb{P}_{\hat{\mathbf{Y}}|\mathbf{x}}^{\theta_{true}^*}} \ell(\hat{\mathbf{Y}}, \check{\mathbf{Y}}) + \theta_{true}^* \cdot (\phi(\mathbf{X}, \check{\mathbf{Y}}) - \phi(\mathbf{X}, \mathbf{Y})) + \varepsilon \|\theta_{true}^*\|_* \\ &= \min_{\theta} \mathbb{E}_{\mathbb{P}^{true}} \min_{\mathbb{P}} \max_{\mathbb{Q}} \mathbb{E}_{\mathbb{Q}_{\hat{\mathbf{Y}}|\mathbf{x}}, \mathbb{P}_{\hat{\mathbf{Y}}|\mathbf{x}}} \ell(\hat{\mathbf{Y}}, \check{\mathbf{Y}}) + \theta^{\top} (\phi(\mathbf{X}, \check{\mathbf{Y}}) - \phi(\mathbf{X}, \mathbf{Y})) + \varepsilon \|\theta\|_* \\ &= \min_{\mathbb{P}} \min_{\theta} \mathbb{E}_{\mathbb{P}^{true}} \max_{\mathbb{Q}} \mathbb{E}_{\mathbb{Q}_{\hat{\mathbf{Y}}|\mathbf{x}}, \mathbb{P}_{\hat{\mathbf{Y}}|\mathbf{x}}} \ell(\hat{\mathbf{Y}}, \check{\mathbf{Y}}) + \theta^{\top} (\phi(\mathbf{X}, \check{\mathbf{Y}}) - \phi(\mathbf{X}, \mathbf{Y})) + \varepsilon \|\theta\|_* \\ &\leq \min_{\theta} \mathbb{E}_{\mathbb{P}^{true}} \max_{\mathbb{Q}} \mathbb{E}_{\mathbb{Q}_{\hat{\mathbf{Y}}|\mathbf{x}}, \mathbb{P}_{\hat{\mathbf{Y}}|\mathbf{x}}^{\theta_{true}^*}} \ell(\hat{\mathbf{Y}}, \check{\mathbf{Y}}) + \theta^{\top} (\phi(\mathbf{X}, \check{\mathbf{Y}}) - \phi(\mathbf{X}, \mathbf{Y})) + \varepsilon \|\theta\|_* \\ &= \max_{\mathbb{Q} \in \mathcal{B}(\mathbb{P}^{true})} R_{\mathbb{Q}}^L(\theta_{true}^*), \end{aligned}$$

where the first equality holds according to the definition of  $\theta_{true}^*$ . The above two inequalities imply the equality:

$$\max_{\mathbb{Q} \in \mathcal{B}(\mathbb{P}^{true})} R_{\mathbb{Q}}^L(\theta_{true}^*) = \mathbb{E}_{\mathbb{P}^{true}} \max_{\mathbb{Q}} \mathbb{E}_{\mathbb{Q}_{\hat{\mathbf{Y}}|\mathbf{x}}, \mathbb{P}_{\hat{\mathbf{Y}}|\mathbf{x}}^{\theta_{true}^*}} \ell(\hat{\mathbf{Y}}, \check{\mathbf{Y}}) + \theta_{true}^* \cdot (\phi(\mathbf{X}, \check{\mathbf{Y}}) - \phi(\mathbf{X}, \mathbf{Y})) + \varepsilon \|\theta_{true}^*\|_*.$$

Therefore,

$$\begin{aligned} & \max_{\mathbb{Q} \in \mathcal{B}(\mathbb{P}^{true})} R_{\mathbb{Q}}^L(\theta_{emp}^*) - \max_{\mathbb{Q} \in \mathcal{B}(\mathbb{P}^{true})} R_{\mathbb{Q}}^L(\theta_{true}^*) \\ &\leq \mathbb{E}_{\mathbb{P}^{true}} \max_{\mathbb{Q}} \mathbb{E}_{\mathbb{Q}_{\hat{\mathbf{Y}}|\mathbf{x}}, \mathbb{P}_{\hat{\mathbf{Y}}|\mathbf{x}}^{\theta_{emp}^*}} \ell(\hat{\mathbf{Y}}, \check{\mathbf{Y}}) + \theta_{emp}^* \cdot (\phi(\mathbf{X}, \check{\mathbf{Y}}) - \phi(\mathbf{X}, \mathbf{Y})) + \varepsilon \|\theta_{emp}^*\|_* \\ &\quad - (\mathbb{E}_{\mathbb{P}^{true}} \max_{\mathbb{Q}} \mathbb{E}_{\mathbb{Q}_{\hat{\mathbf{Y}}|\mathbf{x}}, \mathbb{P}_{\hat{\mathbf{Y}}|\mathbf{x}}^{\theta_{true}^*}} \ell(\hat{\mathbf{Y}}, \check{\mathbf{Y}}) + \theta_{true}^* \cdot (\phi(\mathbf{X}, \check{\mathbf{Y}}) - \phi(\mathbf{X}, \mathbf{Y})) + \varepsilon \|\theta_{true}^*\|_*). \quad (5) \end{aligned}$$

The main idea is thus to use uniform convergence bounds. Firstly, by substituting  $\mathbb{Q} = \mathbb{P}^{\text{true}}$ , note that

$$\min_{\mathbb{P}} \max_{\mathbb{Q}} \mathbb{E}_{\mathbb{Q}_{\tilde{Y}|X} \mathbb{P}_{\tilde{Y}|X}} \ell(\hat{Y}, \check{Y}) + \theta^\top (\phi(X, \check{Y}) - \phi(X, Y)) \geq \min_{\mathbb{P}} \mathbb{E}_{\mathbb{P}^{\text{true}}_{\tilde{Y}|X} \mathbb{P}_{\tilde{Y}|X}} \ell(\hat{Y}, Y) \geq 0.$$

We can get an upper bound of the norm of any optimal solution  $\theta_{\text{true}}^*$  or  $\theta_{\text{emp}}^*$  as follows:

$$0 + \varepsilon \|\theta_{\text{true}}^*\|_* \leq R_{\mathbb{P}^{\text{true}}}^S(\theta_{\text{true}}^*) \leq R_{\mathbb{P}^{\text{true}}}^S(\mathbf{0}) \leq \mathbb{E}_{\mathbb{P}^{\text{true}}_{X,Y}} \min_{\mathbb{P}} \max_{\mathbb{Q}} \mathbb{E}_{\mathbb{Q}_{\tilde{Y}|X} \mathbb{P}_{\tilde{Y}|X}} \ell(\hat{Y}, \check{Y}) \leq K \implies \|\theta_{\text{true}}^*\|_* \leq \frac{K}{\varepsilon}.$$

Let  $\psi(X, Y) := \theta^\top \phi(X, Y)$  and  $\psi_x := (\psi(x, y))_{y \in \mathcal{Y}}$ . Define

$$\begin{aligned} f(\theta, \tilde{\mathbb{P}}) &:= \mathbb{E}_{\tilde{\mathbb{P}}_{X,Y}} \min_{\mathbb{P}} \max_{\mathbb{Q}} \mathbb{E}_{\mathbb{Q}_{\tilde{Y}|X} \mathbb{P}_{\tilde{Y}|X}} \ell(\hat{Y}, \check{Y}) + \theta^\top (\phi(X, \check{Y}) - \phi(X, Y)) \\ &\triangleq \mathbb{E}_{\tilde{\mathbb{P}}_{X,Y}} \max_{\mathbb{Q}} \mathbb{E}_{\mathbb{Q}_{\tilde{Y}|X} \mathbb{P}_{\tilde{Y}|X}^\theta} \ell(\hat{Y}, \check{Y}) + \theta^\top (\phi(X, \check{Y}) - \phi(X, Y)) \\ &\triangleq \mathbb{E}_{\tilde{\mathbb{P}}_{X,Y}} \max_{\mathbb{Q}} \mathbb{E}_{\mathbb{Q}_{\tilde{Y}|X} \mathbb{P}_{\tilde{Y}|X}^\theta} \ell(\hat{Y}, \check{Y}) + \psi(X, \check{Y}) - \psi(X, Y) \\ &\triangleq g(\psi, \tilde{\mathbb{P}}). \end{aligned}$$

Let  $q_x \in \Delta$  be the probability vector of  $\mathbb{Q}_{\tilde{Y}|x}$  and  $e_y$  be the standard basis vector with  $y$ -th entry equal to 1. We have that for any  $(x, y)$ ,

$$\frac{\partial}{\partial \psi_x} g(\psi, \delta_{(x,y)}) \subseteq \text{Conv}(\{q_x - e_y : q_x \in \Delta\}) \implies \left\| \frac{\partial}{\partial \psi_x} g(\psi, \delta_{(x,y)}) \right\|_1 \leq \max_{q_x \in \Delta} \|q_x - e_y\|_1 \leq 2,$$

where  $\delta_{(x,y)}$  is the Dirac point measure.  $g(\cdot, \tilde{\mathbb{P}})$  is therefore 2-Lipschitz with respect to the  $\ell_1$  norm. As per the assumption,  $\|\phi(\cdot, \cdot)\| \leq B$ . This further implies that

$$f(\theta_1, \delta_{(x_1, y_1)}) - f(\theta_2, \delta_{(x_2, y_2)}) \leq \frac{4KB}{\varepsilon} \quad \forall \theta_1, \theta_2, x_1, x_2, y_1, y_2 \quad \text{s.t.} \quad \|\theta_i\|_* \leq \frac{K}{\varepsilon} \quad \forall i = 1, 2.$$

We then follow the proof of Theorem 3 in Farnia and Tse [2016]. According to Theorem 26.12 in Shalev-Shwartz and Ben-David [2014], by uniform convergence, for any  $\rho \in (0, 2]$ , with a probability at least  $1 - \frac{\rho}{2}$ ,

$$f(\theta_{\text{emp}}^*, \mathbb{P}^{\text{true}}) - f(\theta_{\text{emp}}^*, \mathbb{P}^{\text{emp}}) \leq \frac{4KB}{\varepsilon \sqrt{m}} \left( 1 + \sqrt{\frac{\ln(4/\rho)}{2}} \right).$$

According to the definition of  $\theta_{\text{true}}^*$ , the following inequality holds:

$$f(\theta_{\text{emp}}^*, \mathbb{P}^{\text{emp}}) + \varepsilon \|\theta_{\text{emp}}^*\|_* - f(\theta_{\text{true}}^*, \mathbb{P}^{\text{emp}}) - \varepsilon \|\theta_{\text{true}}^*\|_* \leq 0.$$

Since  $\theta_{\text{true}}^*$  do not depend on samples, according to the Hoeffding's inequality, with a probability  $1 - \rho/2$ ,

$$f(\theta_{\text{true}}^*, \mathbb{P}^{\text{emp}}) - f(\theta_{\text{true}}^*, \mathbb{P}^{\text{true}}) \leq \frac{2KB}{\varepsilon \sqrt{m}} \sqrt{\frac{\ln(4/\rho)}{2}}.$$

Applying the union bound to the above three inequations, with a probability  $1 - \rho$ , we have

$$f(\theta_{\text{emp}}^*, \mathbb{P}^{\text{true}}) + \varepsilon \|\theta_{\text{emp}}^*\|_* - f(\theta_{\text{true}}^*, \mathbb{P}^{\text{true}}) - \varepsilon \|\theta_{\text{true}}^*\|_* \leq \frac{4KB}{\varepsilon \sqrt{m}} \left( 1 + \frac{3}{2} \sqrt{\frac{\ln(4/\rho)}{2}} \right).$$

As stated by Inequation (5), we conclude with the following excess risk bound:

$$\max_{\mathbb{Q} \in \mathcal{B}(\mathbb{P}^{\text{true}})} R_{\mathbb{Q}}^L(\theta_{\text{emp}}^*) - \max_{\mathbb{Q} \in \mathcal{B}(\mathbb{P}^{\text{true}})} R_{\mathbb{Q}}^L(\theta_{\text{true}}^*) \leq \frac{4KB}{\varepsilon \sqrt{m}} \left( 1 + \frac{3}{2} \sqrt{\frac{\ln(4/\rho)}{2}} \right).$$

□

**Corollary 3.** When  $\varepsilon = 0$ ,  $\ell_{adv}$  is Fisher consistent with respect to  $\ell$ . Namely,

$$\mathbb{P}_{\hat{\mathbf{Y}}|\mathbf{X}}^{\theta_{true}^*} \in \arg \min_{\mathbb{P}_{\hat{\mathbf{Y}}|\mathbf{X}}} \mathbb{E}_{\mathbb{P}_{\mathbf{X}, \mathbf{Y}}, \mathbb{P}_{\hat{\mathbf{Y}}|\mathbf{X}}} \ell(\hat{\mathbf{Y}}, \mathbf{Y}),$$

where  $\theta_{true}^*$  is learned with  $\ell_{adv}$  and  $\mathbb{P}^{true}$  as in Theorem 2.

*Proof.* Our formulation differs from Nowak-Vila et al. [2020] in the fact that we allow probabilistic prediction to be ground truth. By defining  $y^*(\mu)$  as the gold standard probabilistic prediction and  $\mathcal{Y}$  as the set of all possible probabilistic predictions in Proposition C.2 in Nowak-Vila et al. [2020], we have

$$\mathbb{P}_{\hat{\mathbf{Y}}|\mathbf{x}}^{\theta_{true}^*} \in \text{Conv}(\arg \min_{\mathbb{P}_{\hat{\mathbf{Y}}|\mathbf{x}}} \mathbb{E}_{\mathbb{P}_{\mathbf{Y}|\mathbf{x}}, \mathbb{P}_{\hat{\mathbf{Y}}|\mathbf{x}}} \ell(\hat{\mathbf{Y}}, \mathbf{Y})).$$

Therefore,

$$\mathbb{P}_{\hat{\mathbf{Y}}|\mathbf{x}}^{\theta_{true}^*} \in \arg \min_{\mathbb{P}_{\hat{\mathbf{Y}}|\mathbf{x}}} \mathbb{E}_{\mathbb{P}_{\mathbf{Y}|\mathbf{x}}, \mathbb{P}_{\hat{\mathbf{Y}}|\mathbf{x}}} \ell(\hat{\mathbf{Y}}, \mathbf{Y}).$$

□

**Proposition 4.** Let  $\mathcal{G}$  be a multi-graph.  $\mathcal{A}_{marb} \triangleq \mathcal{A}_{arb}$ .

*Proof.* We follow the proof of Friesen [2019] for simple graphs. Recall the definition of  $\mathcal{A}_{marb}$ :

$$\begin{aligned} \mathcal{A}_{marb} &:= \{z^r : \exists z \geq \mathbf{0} \\ &\sum_{a \in \delta^-(j)} z_a^k = \mathbf{1}(j \neq k) \forall k, j \in \mathcal{V} \wedge \end{aligned} \quad (6)$$

$$\sum_{a \in \mathcal{E}'_{ij}} z_a^k = \sum_{a \in \mathcal{E}_{ij}} z_a^r \quad \forall k \neq r, i, j \in \mathcal{V}\}. \quad (7)$$

On one hand, given a legal  $r$ -arborescence with characteristic vector  $z^r$ , Eq. (6) and Eq. (7) hold by the definition of arborescences. The equality also holds for a convex combination of the characteristic vectors of  $r$ -arborescences.

On the other hand, given  $z \in \mathcal{A}_{marb}$ . Consider Edmond's definition of  $r$ -arborescence polytope based on rank constraints:

$$\sum_{a \in S} x_a \leq |S| - 1 \quad \forall S \subset \mathcal{V} \text{ with } S \neq \emptyset \quad (8)$$

$$\sum_{a \in \delta^-(j)} x_a = \mathbf{1}(j \neq r) \quad \forall j \in \mathcal{V} \quad (9)$$

$$\mathbf{x} \geq \mathbf{0}.$$

We have Eq. (6) directly implies Eq. (9). According to Eq. (7),

$$\sum_{a \in S} z_a^r = \sum_{a \in S} z_a^u \quad \forall S \subseteq \mathcal{V} \wedge u \in \mathcal{V}.$$

Therefore,

$$\sum_{a \in S} z_a^r = \sum_{a \in S} z_a^u \leq \sum_{j \in S} \sum_{a \in \delta^-(j)} z_a^u = |S| - 1 \quad \forall S \subseteq \mathcal{V} \wedge u \in S,$$

which is exactly Eq. (8). □

**Proposition 5.** Let  $\mathcal{G}$  be a multi-graph.  $\mathcal{A}_{mdep} \triangleq \mathcal{A}_{dep}$ .

*Proof.* Recall the definition of  $\mathcal{A}_{mdep}$ :

$$\begin{aligned} \mathcal{A}_{mdep} &:= \{z^r : z^r \in \mathcal{A}_{marb} \wedge \\ &\sum_{a \in \delta^+(r)} z_a^r = 1\}. \end{aligned} \quad (10)$$

---

**Algorithm 1** Double Oracle Game Solver

---

**Input:** Lagrange multipliers  $\theta$ ; feature function  $\phi(\cdot, \cdot)$ ; initial set of trees  $\{y_{\text{initial}}\}$   
**Output:** A sparse Nash equilibrium  $(\hat{\mathcal{T}}, \check{\mathcal{T}}, \mathbb{P}, \mathbb{Q})$   
Initialize  $\hat{\mathcal{T}} \leftarrow \check{\mathcal{T}} \leftarrow \{y_{\text{initial}}\}$   
**repeat**  
     $(\mathbb{P}, \hat{v}_{\text{Nash}}) \leftarrow \text{SolveZeroSumGame}_{\hat{\mathcal{T}}}(\ell, \theta^\top \phi, \hat{\mathcal{T}}, \check{\mathcal{T}})$   
     $(\check{y}_{\text{BR}}, \check{v}_{\text{BR}}) \leftarrow \text{FindBestResponse}(\ell, \theta^\top \phi, \mathbb{P}, \check{\mathcal{T}})$   
    **if**  $\hat{v}_{\text{Nash}} \neq \check{v}_{\text{BR}}$  **then**  
         $\check{\mathcal{T}} \leftarrow \check{\mathcal{T}} \cup \{\check{y}_{\text{BR}}\}$   
    **end if**  
     $(\mathbb{Q}, \check{v}_{\text{Nash}}) \leftarrow \text{SolveZeroSumGame}_{\check{\mathcal{T}}}(\ell, \theta^\top \phi, \hat{\mathcal{T}}, \check{\mathcal{T}})$   
     $(\hat{y}_{\text{BR}}, \hat{v}_{\text{BR}}) \leftarrow \text{FindBestResponse}(\ell, \theta^\top \phi, \mathbb{Q}, \hat{\mathcal{T}})$   
    **if**  $\check{v}_{\text{Nash}} \neq \hat{v}_{\text{BR}}$  **then**  
         $\hat{\mathcal{T}} \leftarrow \hat{\mathcal{T}} \cup \{\hat{y}_{\text{BR}}\}$   
    **end if**  
**until**  $\hat{v}_{\text{Nash}} = \check{v}_{\text{BR}} = \check{v}_{\text{Nash}} = \hat{v}_{\text{BR}}$   
**return**  $(\hat{\mathcal{T}}, \check{\mathcal{T}}, \mathbb{P}, \mathbb{Q})$

---

On one hand, given a legal dependency tree  $z^r \in \mathcal{A}_{\text{dep}}$ , it satisfies Eq. (6) and Eq. (7) by Proposition 4. It also satisfies Eq. (10) by the definition of  $\mathcal{A}_{\text{dep}}$ .

On the other hand, given  $z^r \in \mathcal{A}_{\text{mdep}}$ , firstly,  $z^r$  must be in  $\mathcal{A}_{\text{arb}}$  by Proposition 4, which implies that we can write it as a convex combination of  $k$   $r$ -arborescences vectors:  $z^r \triangleq \alpha_1 t^1 + \alpha_2 t^2 + \dots + \alpha_k t^k$ . All of them are legal  $r$ -arborescences, so  $\sum_{a \in \delta^+(r)} t_a^i \geq 1$  for all  $i \in [k]$ . Now if  $\sum_{a \in \delta^+(r)} t_a^i > 1$  for some  $i$ , we would have a contradiction,  $\sum_{a \in \delta^+(r)} z_a^r > 1$ .  $\square$

## B Algorithm Details

The pseudo-code of the constraint generation algorithm proposed in Section 3.2 is illustrated in Algorithm 1.

## C More on Experiments

We adopt three public datasets, the English Penn Treebank (PTB v3.0) [Marcus et al., 1993], the Penn Chinese Treebank (CTB v5.1) [Xue et al., 2002], the Dutch Lassy Small Treebank and the Turkish Treebank in Universal Dependencies (UD v2.3) [Nivre et al., 2016]. We follow conventions in Chen and Manning [2014], Dyer et al. [2015] to prepare our data. We make standard train/validation/test splits. We use Stanford Dependencies (SD v3.3.0) [De Marneffe and Manning, 2008] to convert dependencies in PTB and CTB. The predicted POS tags with Stanford POS tagger [Toutanova et al., 2003] are adopted for PTB whereas gold POS tags are adopted for CTB and UD. Punctuation is excluded during evaluation<sup>6</sup>.

The pretrained models are trained with the suggested hyperparameters in SuPar. The pretrained models achieve 97.25%, 91.91% and 94.78% UAS on PTB, CTB and UD Dutch respectively, where RoBERTa [Liu et al., 2019], ELECTRA [Cui et al., 2020] and XLM-RoBERTa [Conneau et al., 2019] are adopted as encoders. No BERT embeddings are adopted for the UD Turkish dataset.

For our ADMM algorithm, we adopt the adaptive scheme of varying penalty parameters ( $\tau_{\text{incr}} = \tau_{\text{decr}} = 1.1, \mu = 1$ ) in Boyd et al. [2011] and the stopping criterion ( $\epsilon_{\text{tol}} = 10^{-2}$ ) for consensus ADMM in Xu et al. [2017]. In FW, the learning rate is set to  $\frac{2}{t+2}$ . The smoothness weight  $\mu$  and ambiguity radius  $\lambda = 2\epsilon$  are tuned using a logarithmic scale on  $[10^{-7}, 1]$ . The batch size for the game-theoretic algorithm is 10. The batch size for *Stochastic* is 200. The error tolerance in *Game* is set to  $10^{-2}$ . In stochastic gradient training, we use Adam with  $lr = 10^{-2}, \beta_1 = 0.9$ ,

---

<sup>6</sup>A token is a punctuation if its gold POS tag is space, semi-colon, comma or period for English and PU for Chinese.

$\beta_2 = 0.999$ ,  $\epsilon = 10^{-8}$ . In our experiments, for efficiency, we again adopt the FW algorithm for the outer maximization in *Marginal*.

Complete main experimental results including all the metrics are shown in Table 2.

## D Extension Details

For the dependency tree polytope, recall that the dual problem of projection onto  $\mathcal{U}'_r := \{\mathbf{x} : \mathbf{x} \in \mathcal{U}_r \wedge \sum_{a \in \delta^+(r)} x_a = 1\}$  is

$$\max_{\alpha, \beta} \sum_{a \in \mathcal{E}} h_a(\alpha, \beta) - \sum_{j \neq r} \alpha_j - \beta \quad \text{s.t. } h_a(\alpha, \beta) = \begin{cases} w_a^2 & \gamma_a > 2w_a, \\ w_a \gamma_a - \gamma_a^2/4 & \gamma_a \leq 2w_a, \end{cases}$$

where  $\gamma_{(i,j,l)} := \alpha_j + \mathbb{1}(i=r)\beta$ . Following Zhang et al. [2010] similarly, we sort  $2w_{(i,j,l)}$  for each  $j$  and compute the optimal  $\alpha_j^*$  with  $\beta = 0$ . Let the sorted  $w$ 's be  $(w_1^{(j)}, \dots, w_n^{(j)})$  for each  $j$ . We blend create a set  $\{w_x^{(j)} - \alpha_j^*\}$  for all  $j$  and  $x$ . Let the sorted sequence be  $-\infty = t_1 < t_2 < \dots < t_{n_t} = \infty$ . The derivative with respect to  $\beta$  is piecewise-linear in each interval  $[t_k, t_{k+1}]$ . Since the objective is concave in  $\beta$ , we can iterate over all the intervals or find the optimal  $\beta^*$  with binary search.

For higher-order tree local polytopes, the central problem is the projection onto

$$\mathcal{U}_s := \{\mathbf{x} \in \mathbb{R}_{\geq 0}^{|\mathcal{R}|} : x_s \leq x_a \quad \forall a \in s\}.$$

The only variables of interest are  $x_a$  and  $x_s$ , given  $x_s$ , the optimal  $x_a$  is simply  $x_a^* = \max(w_a, x_s)$ . We can sort  $(w_a, w_s)_{a \in s}$  and enumerate the range  $x_s$  takes over this set.

## E Wong's Arborescence Polytope

We introduce another extended formulation of the arborescence polytope based on a multi-commodity flow representation [Wong, 1980, Martins, 2012, Friesen, 2019] as follows, which may be of independent interest:

$$\sum_{a \in \delta^-(j)} x_a = \mathbb{1}(j \neq r) \quad \forall j \in \mathcal{V} \quad (11)$$

$$\sum_{a \in \delta^-(j)} f_a^k - \sum_{a \in \delta^+(j)} f_a^k = \mathbb{1}(j = k) - \mathbb{1}(j = r) \quad \forall k \in \mathcal{V} \setminus \{r\}, j \in \mathcal{V} \quad (12)$$

$$0 \leq f_a^k \leq x_a \quad \forall a \in \mathcal{E}, k \in \mathcal{V} \setminus \{r\}. \quad (13)$$

Thus we have the arborescence polytope:

$$\mathcal{A}_{\text{mc}} = \{\mathbf{x} \in \mathbb{R}^{|\mathcal{E}|} | \exists \mathbf{f} : (\mathbf{x}, \mathbf{f}) \text{ satisfy equations (11) - (13)}\}.$$

According to Martins [2012], Friesen [2019],  $\mathcal{A}_{\text{mc}} \triangleq \mathcal{A}_{\text{arb}}$  instead of an outer polytope of  $\mathcal{A}_{\text{arb}}$ .

We are interested in the following quadratic programming problem with linear inequality constraints:

$$\min_{\mathbf{x} \in \mathcal{A}_{\text{mc}}} \|\mathbf{x} - \mathbf{w}\|_2^2.$$

We can reformulate the problem as

$$\min_{\mathbf{x}, \mathbf{u}} g(\mathbf{x}, \mathbf{u}) := \frac{1}{2} \|\mathbf{x} - \mathbf{w}\|_2^2 + \frac{1}{2} \|\mathbf{u} - \mathbf{w}\|_2^2 + I_{\mathcal{X}}(\mathbf{x}) + I_{\mathcal{U}}(\mathbf{u})$$

s.t.  $\mathbf{x} = \mathbf{u}$

$$\mathcal{X} := \{\mathbf{x} : \sum_{a \in \delta^-(j)} x_a = \mathbb{1}(j \neq r) \forall j \in \mathcal{V} \wedge x_a \geq 0 \forall a \in \mathcal{E}\}$$

$$\mathcal{U} := \{\mathbf{u} : \exists \mathbf{f} \sum_{a \in \delta^-(j)} f_a^k - \sum_{a \in \delta^+(j)} f_a^k = \mathbb{1}(j = k) - \mathbb{1}(j = r) \quad \forall k \in \mathcal{V} \setminus \{r\}, j \in \mathcal{V}$$

$$0 \leq f_a^k \leq u_a \quad \forall k \in \mathcal{V} \setminus \{r\}, a \in \mathcal{E}\}.$$

Table 2: Comparison of mean UAS, LAS, UCM and LCM under different training set sizes. Statistically significant differences compared to BiAF are marked with † (paired t-test,  $p < 0.05$ ). We highlight in bold the best results among the four methods.

| Dataset    | # train | Metric | BiAF                | Marginal             | Stochastic           | Game                 |
|------------|---------|--------|---------------------|----------------------|----------------------|----------------------|
| PTB        | 10      | UAS    | 93.48 ± 2.30        | 94.51 ± 1.71†        | <b>94.62 ± 1.60†</b> | 94.51 ± 1.75†        |
|            |         | LAS    | 92.02 ± 2.26        | 93.04 ± 1.69†        | <b>93.14 ± 1.58†</b> | 93.04 ± 1.73†        |
|            |         | UCM    | 47.17 ± 10.28       | 52.30 ± 8.71†        | <b>52.62 ± 8.18†</b> | 52.50 ± 8.60†        |
|            |         | LCM    | 39.73 ± 7.96        | 43.63 ± 6.71†        | <b>43.97 ± 6.39†</b> | 43.86 ± 6.58†        |
|            | 50      | UAS    | <b>96.87 ± 0.06</b> | 96.81 ± 0.05†        | 96.81 ± 0.05         | 96.86 ± 0.05         |
|            |         | LAS    | <b>95.34 ± 0.06</b> | 95.28 ± 0.05†        | 95.28 ± 0.05         | 95.33 ± 0.05         |
|            |         | UCM    | 67.65 ± 0.81        | 67.38 ± 0.62         | 67.18 ± 0.79         | <b>67.73 ± 0.64</b>  |
|            |         | LCM    | <b>55.46 ± 0.59</b> | 54.93 ± 0.56†        | 54.79 ± 0.59†        | 55.17 ± 0.49         |
|            | 100     | UAS    | <b>96.95 ± 0.05</b> | 96.92 ± 0.06         | 96.93 ± 0.05         | 96.92 ± 0.03         |
|            |         | LAS    | <b>95.42 ± 0.05</b> | 95.39 ± 0.06         | 95.40 ± 0.04         | 95.39 ± 0.02         |
|            |         | UCM    | <b>68.79 ± 0.42</b> | 68.27 ± 0.72         | 68.36 ± 0.41         | 68.29 ± 0.34         |
|            |         | LCM    | <b>56.21 ± 0.14</b> | 55.68 ± 0.56         | 55.67 ± 0.45         | 55.66 ± 0.33         |
|            | 1000    | UAS    | <b>97.16 ± 0.02</b> | 97.12 ± 0.03         | 97.14 ± 0.02         | 97.08 ± 0.03†        |
|            |         | LAS    | <b>95.63 ± 0.03</b> | 95.59 ± 0.02         | 95.60 ± 0.02         | 95.55 ± 0.03†        |
|            |         | UCM    | <b>70.99 ± 0.23</b> | 70.59 ± 0.49         | 70.61 ± 0.32         | 69.94 ± 0.34†        |
|            |         | LCM    | <b>57.57 ± 0.09</b> | 57.18 ± 0.28†        | 57.24 ± 0.28†        | 56.80 ± 0.23†        |
| CTB        | 10      | UAS    | 88.45 ± 0.67        | 89.19 ± 0.38†        | <b>89.27 ± 0.33†</b> | 89.22 ± 0.39†        |
|            |         | LAS    | 84.79 ± 0.62        | 85.50 ± 0.35†        | <b>85.58 ± 0.30†</b> | 85.53 ± 0.36†        |
|            |         | UCM    | 35.21 ± 1.67        | 36.83 ± 1.20         | <b>37.14 ± 0.94†</b> | 36.95 ± 1.23†        |
|            |         | LCM    | 25.86 ± 0.87        | 26.82 ± 0.62         | <b>26.95 ± 0.59†</b> | 26.95 ± 0.63†        |
|            | 50      | UAS    | 90.89 ± 0.10        | 91.03 ± 0.05†        | 91.03 ± 0.05†        | <b>91.06 ± 0.05†</b> |
|            |         | LAS    | 87.08 ± 0.10        | 87.20 ± 0.05†        | 87.20 ± 0.05†        | <b>87.23 ± 0.06†</b> |
|            |         | UCM    | 42.54 ± 0.24        | 42.92 ± 0.24†        | 42.86 ± 0.12†        | <b>42.99 ± 0.30</b>  |
|            |         | LCM    | 29.70 ± 0.23        | 29.69 ± 0.36         | 29.72 ± 0.38         | <b>29.79 ± 0.23</b>  |
|            | 100     | UAS    | 91.15 ± 0.16        | 91.27 ± 0.08         | <b>91.27 ± 0.10</b>  | 91.22 ± 0.05         |
|            |         | LAS    | 87.32 ± 0.14        | 87.42 ± 0.06         | <b>87.42 ± 0.08</b>  | 87.37 ± 0.05         |
|            |         | UCM    | 43.41 ± 0.35        | <b>43.91 ± 0.27†</b> | 43.86 ± 0.43†        | 43.81 ± 0.22         |
|            |         | LCM    | 30.02 ± 0.22        | <b>30.27 ± 0.25</b>  | 30.23 ± 0.28         | 30.26 ± 0.26         |
|            | 1000    | UAS    | <b>91.70 ± 0.04</b> | 91.67 ± 0.03         | 91.66 ± 0.03         | 91.57 ± 0.03†        |
|            |         | LAS    | <b>87.84 ± 0.04</b> | 87.80 ± 0.03         | 87.79 ± 0.03         | 87.70 ± 0.03†        |
|            |         | UCM    | <b>45.80 ± 0.27</b> | 45.43 ± 0.11†        | 45.41 ± 0.12†        | 45.36 ± 0.27†        |
|            |         | LCM    | 31.14 ± 0.19        | 31.11 ± 0.18         | 31.08 ± 0.17         | <b>31.20 ± 0.11</b>  |
| UD Dutch   | 10      | UAS    | 90.86 ± 1.23        | <b>92.41 ± 0.94†</b> | 92.40 ± 0.91†        | 92.32 ± 1.03†        |
|            |         | LAS    | 86.54 ± 1.26        | <b>88.10 ± 0.95†</b> | 88.08 ± 0.91†        | 87.99 ± 1.00†        |
|            |         | UCM    | 64.11 ± 2.18        | <b>67.26 ± 2.16†</b> | 67.21 ± 1.91†        | 67.26 ± 1.97†        |
|            |         | LCM    | 48.33 ± 1.88        | 50.32 ± 1.75†        | <b>50.48 ± 1.45†</b> | 50.46 ± 1.30†        |
|            | 50      | UAS    | 93.80 ± 0.43        | 94.22 ± 0.26†        | 94.23 ± 0.18†        | <b>94.34 ± 0.24†</b> |
|            |         | LAS    | 89.36 ± 0.33        | 89.79 ± 0.21†        | 89.79 ± 0.12†        | <b>89.89 ± 0.18†</b> |
|            |         | UCM    | 70.57 ± 1.52        | 72.42 ± 0.90†        | 72.05 ± 0.99         | <b>72.60 ± 1.39</b>  |
|            |         | LCM    | 52.40 ± 0.61        | 53.47 ± 0.62†        | 53.40 ± 0.59         | <b>53.58 ± 0.76</b>  |
|            | 100     | UAS    | 94.15 ± 0.18        | 94.50 ± 0.18†        | 94.47 ± 0.13         | <b>94.59 ± 0.12†</b> |
|            |         | LAS    | 89.69 ± 0.18        | 90.04 ± 0.15†        | 90.01 ± 0.12         | <b>90.12 ± 0.10†</b> |
|            |         | UCM    | 71.71 ± 0.92        | 73.24 ± 0.88†        | 73.01 ± 0.99         | <b>73.63 ± 0.75†</b> |
|            |         | LCM    | 53.01 ± 0.81        | 53.79 ± 0.40         | 53.70 ± 0.55         | <b>54.13 ± 0.44†</b> |
|            | 1000    | UAS    | 94.98 ± 0.07        | <b>95.15 ± 0.10†</b> | 95.14 ± 0.11†        | 95.01 ± 0.05         |
|            |         | LAS    | 90.44 ± 0.06        | <b>90.59 ± 0.08†</b> | 90.59 ± 0.08†        | 90.44 ± 0.06         |
|            |         | UCM    | 74.73 ± 0.33        | <b>75.87 ± 0.63†</b> | 75.64 ± 0.57†        | 75.41 ± 0.56         |
|            |         | LCM    | 54.59 ± 0.13        | <b>55.21 ± 0.17†</b> | 55.16 ± 0.21†        | 54.70 ± 0.22         |
| UD Turkish | 10      | UAS    | 17.64 ± 2.45        | 24.85 ± 2.35†        | <b>25.06 ± 0.58†</b> | 19.85 ± 0.46         |
|            |         | LAS    | 4.86 ± 2.74         | 5.33 ± 2.97          | <b>5.40 ± 2.85</b>   | 5.02 ± 3.04          |
|            |         | UCM    | 7.69 ± 1.72         | 9.03 ± 1.33          | 7.88 ± 2.27          | <b>10.03 ± 0.54</b>  |
|            |         | LCM    | 1.46 ± 1.03         | 1.50 ± 1.07          | 1.50 ± 1.07          | <b>1.74 ± 1.38</b>   |
|            | 50      | UAS    | 26.59 ± 2.37        | <b>32.83 ± 1.50†</b> | 31.35 ± 1.10†        | 23.18 ± 2.03†        |
|            |         | LAS    | 10.14 ± 0.57        | 10.73 ± 0.86         | <b>10.74 ± 0.54</b>  | 10.10 ± 0.69         |
|            |         | UCM    | 10.03 ± 1.31        | 10.63 ± 0.50         | <b>10.81 ± 0.50</b>  | 10.34 ± 0.36         |
|            |         | LCM    | 3.24 ± 0.31         | 3.26 ± 0.24          | 3.38 ± 0.27          | <b>3.43 ± 0.27</b>   |
|            | 100     | UAS    | 30.75 ± 1.13        | <b>33.75 ± 0.86†</b> | 33.62 ± 1.49†        | 27.12 ± 1.25†        |
|            |         | LAS    | 10.84 ± 0.80        | 11.48 ± 0.75         | <b>11.69 ± 0.67†</b> | 10.48 ± 0.70†        |
|            |         | UCM    | <b>11.61 ± 1.22</b> | 11.30 ± 0.29         | 11.34 ± 0.26         | 11.08 ± 0.44         |
|            |         | LCM    | 3.53 ± 0.60         | <b>3.61 ± 0.31</b>   | 3.57 ± 0.23          | 3.55 ± 0.23          |
|            | 1000    | UAS    | 42.82 ± 1.82        | <b>43.18 ± 1.73</b>  | 41.20 ± 2.17†        | 36.30 ± 2.79†        |
|            |         | LAS    | <b>18.44 ± 1.00</b> | 18.24 ± 1.62         | 18.13 ± 1.13         | 16.38 ± 1.20†        |
|            |         | UCM    | <b>15.86 ± 0.40</b> | 15.18 ± 0.81         | 13.78 ± 0.30†        | 13.52 ± 0.43†        |
|            |         | LCM    | <b>4.49 ± 0.47</b>  | 4.37 ± 0.46          | 4.31 ± 0.41†         | 4.29 ± 0.38†         |

The scaled augmented Lagrangian function is

$$\begin{aligned}
L_\rho(\mathbf{x}, \mathbf{u}, \mathbf{y}) &= g(\mathbf{x}, \mathbf{u}) + \boldsymbol{\lambda}^\top(\mathbf{x} - \mathbf{u}) + \frac{\rho}{2}\|\mathbf{x} - \mathbf{u}\|_2^2 \\
&= g(\mathbf{x}, \mathbf{u}) + \frac{\rho}{2}\|\mathbf{x} - \mathbf{u} + \frac{1}{\rho}\boldsymbol{\lambda}'\|_2^2 - \frac{1}{2\rho}\|\boldsymbol{\lambda}'\|_2^2 \\
&= g(\mathbf{x}, \mathbf{u}) + \frac{\rho}{2}\|\mathbf{x} - \mathbf{u} + \boldsymbol{\lambda}\|_2^2 - \frac{\rho}{2}\|\boldsymbol{\lambda}\|_2^2,
\end{aligned}$$

where  $\boldsymbol{\lambda} := \frac{1}{\rho}\boldsymbol{\lambda}'$ .

The ADMM algorithm updates the parameters as follows:

$$\begin{aligned}
\mathbf{x}^{t+1} &:= \arg \min_{\mathbf{x}} L_\rho(\mathbf{x}, \mathbf{u}^t, \boldsymbol{\lambda}^t) \\
&= \arg \min_{\mathbf{x}} \frac{1}{2}\|\mathbf{x} - \mathbf{w}\|_2^2 + I_{\mathcal{X}}(\mathbf{x}) + \frac{\rho}{2}\|\mathbf{x} - \mathbf{u}^t + \boldsymbol{\lambda}^t\|_2^2 \\
&= \arg \min_{\mathbf{x} \in \mathcal{X}} \|\mathbf{x} - \frac{1}{\rho+1}(\mathbf{w} + \rho\mathbf{u}^t - \rho\boldsymbol{\lambda}^t)\|_2^2, \\
&\triangleq \text{Proj}_{\mathcal{X}}\left(\frac{1}{\rho+1}(\mathbf{w} + \rho\mathbf{u}^t - \rho\boldsymbol{\lambda}^t)\right) \\
\mathbf{u}^{t+1} &:= \arg \min_{\mathbf{u}} L_\rho(\mathbf{x}^{t+1}, \mathbf{u}, \boldsymbol{\lambda}^t) \\
&= \arg \min_{\mathbf{u}} \frac{1}{2}\|\mathbf{u} - \mathbf{w}\|_2^2 + I_{\mathcal{U}}(\mathbf{u}) + \frac{\rho}{2}\|\mathbf{x}^{t+1} - \mathbf{u} + \boldsymbol{\lambda}^t\|_2^2 \\
&= \arg \min_{\mathbf{u} \in \mathcal{U}} \|\mathbf{u} - \frac{1}{\rho+1}(\mathbf{w} + \rho\mathbf{x}^{t+1} + \rho\boldsymbol{\lambda}^t)\|_2^2, \\
&\triangleq \text{Proj}_{\mathcal{U}}\left(\frac{1}{\rho+1}(\mathbf{w} + \rho\mathbf{x}^{t+1} + \rho\boldsymbol{\lambda}^t)\right) \\
\boldsymbol{\lambda}^{t+1} &:= \boldsymbol{\lambda}^t + (\mathbf{x}^{t+1} - \mathbf{u}^{t+1}).
\end{aligned}$$

Projection onto  $\mathcal{X}$  is decomposable over each  $j \in \mathcal{V}$ . And for each  $j$ , the optimal value of the group can be computed in  $\mathcal{O}(n)$  in almost closed form via Section 5.5.1 in Zhang et al. [2010] or other simplex projection algorithms in  $\mathcal{O}(n \log n)$ .

Projection onto  $\mathcal{U}$  is a minimum quadratic capacity expansion cost problem for fixed multi-commodity flows:

$$\min_{\mathbf{u} \in \mathcal{U}} \|\mathbf{u} - \mathbf{w}\|_2^2.$$

A partially relaxed problem is

$$\begin{aligned}
&\max_{\boldsymbol{\beta}} \min_{\mathbf{u}, \mathbf{f}} \|\mathbf{u} - \mathbf{w}\|_2^2 + \sum_{a,k} \beta_a^k (f_a^k - u_a) \\
\text{s.t.} \quad &\sum_{a \in \delta^-(j)} f_a^k - \sum_{a \in \delta^+(j)} f_a^k = \mathbb{I}(j = k) - \mathbb{I}(j = r) \quad \forall k \in \mathcal{V} \setminus \{r\}, j \in \mathcal{V} \\
&f_a^k \geq 0, \beta_a^k \geq 0 \quad \forall k \in \mathcal{V} \setminus \{r\}, a \in \mathcal{E}.
\end{aligned}$$

Given  $\boldsymbol{\beta}$ , the sub-problem for  $\mathbf{u}$  is

$$\min_{\mathbf{u}} \sum_a u_a^2 - 2u_a w_a - \sum_k \beta_a^k u_a,$$

with an analytical solution

$$\mathbf{u}^* = \mathbf{w} + \frac{1}{2}\boldsymbol{\beta}^k.$$



Given  $\beta$ , the sub-problem for  $f$  is

$$\begin{aligned} & \min_{\mathbf{f}} \sum_{a,k} \beta_a^k f_a^k \\ \text{s.t.} \quad & \sum_{a \in \delta^-(j)} f_a^k - \sum_{a \in \delta^+(j)} f_a^k = \mathbb{I}(j = k) - \mathbb{I}(j = r) \forall k \in \mathcal{V} \setminus \{r\}, j \in \mathcal{V} \\ & f_a^k \geq 0 \quad \forall k \in \mathcal{V} \setminus \{r\}, a \in \mathcal{E}, \end{aligned}$$

which is a minimum-cost multi-commodity flow problem.

With  $\mathbf{u}^*$  and  $\mathbf{f}^*$ , we can optimize  $\beta$  with sub-gradient ascent.

Alternatively, another partially relaxed problem is

$$\begin{aligned} & \max_{\beta} \min_{\mathbf{u}, \mathbf{f}} \|\mathbf{u} - \mathbf{w}\|_2^2 + \sum_{a,k} f_a^k (\beta_{h(a)}^k - \beta_{t(a)}^k) + \sum_k \beta_r^k - \beta_k^k \\ \text{s.t.} \quad & 0 \leq f_a^k \leq u_a, \beta_a^k \geq 0 \quad \forall k \in \mathcal{V} \setminus \{r\}, a \in \mathcal{E}, \end{aligned}$$

where  $h(a)$  and  $t(a)$  are the head and tail of arc  $a$  respectively.

Given  $\beta$ , the inner minimization problem is decomposed over  $a$ :

$$\begin{aligned} & \min_{\mathbf{u}, \mathbf{f}} u_a^2 - 2u_a w_a + \sum_k f_a^k (\beta_{h(a)}^k - \beta_{t(a)}^k) \\ \text{s.t.} \quad & 0 \leq f_a^k \leq u_a \quad \forall k \in \mathcal{V} \setminus \{r\}, \end{aligned}$$

which is a convex continuous knapsack problem for each  $a$ .

The above optimization requires sub-gradient methods, which are usually slower than FW ( $\mathcal{O}(\frac{1}{\epsilon^2})$ ).
